# Supplementary material for: The disordered p53 transactivation domain is the target of FOXO4 and the senolytic compound FOXO4-DRI
Source: Nat Commun. 2025 Jul 1;16:5672. doi: 10.1038/s41467-025-60844-9 (PMC12216184; doi:10.1038/s41467-025-60844-9)
Supplement: Supplementary file 4 — Source Data [file 41467_2025_60844_MOESM4_ESM.xlsx]

## Sheet: Figure 1c
Figure 1c
Residue Number	CSP
1	0.0151898
2	0.0162218
3	0.00234432
5	0.0181694
6	0.0239597
7	0.0367071
9	0.0169187
10	0.0451161
11	0.0269975
14	0.0392603
15	0.0218955
17	0.0254544
18	0.0182074
19	0.0348891
20	0.049197
21	0.0448614
22	0.0254273
23	0.077136
24	0.0785894
25	0.0595149
26	0.0831397
28	0.0282575
29	0.0620349
30	0.140766
31	0.0633082
32	0.150353
33	0.0753143
35	0.0639661
37	0.0372851
38	0.135126
39	0.0179745
40	0.0987421
41	0.0898511
42	0.113867
43	0.104223
44	0.140202
45	0.143312
46	0.0615757
48	0.230823
49	0.232222
50	0.119121
51	0.461488
52	0.274959
53	0.195592
54	0.155001
55	0.262464
56	0.0732273
57	0.1237
59	0.0163707
61	0.0161404
62	0.0166012
63	0.0292072
65	0.0159221
66	0.00747242
68	0.0170153
69	0.00710706
73	0.0880572
74	0.0123271
81	0.00972428
90	0.0036344
91	0.00654965
93	0.00782756
94	0.00897721

## Sheet: Figure 1d
Figure 1d
Residue Number	CSP
39	0.00833964
40	0.0044694
41	0.0105573
42	0.00818816
43	0.00130644
44	0.0132786
45	0.0128698
46	0.0444593
48	0.0530076
49	0.0162051
50	0.020475
51	0.12498
52	0.105402
53	0.0814203
54	0.144664
55	0.104119
56	0.004179
57	0.0108304

## Sheet: Figure 1e
Figure 1e
Residue Number	CSP
85	0.0259832
86	0.0139985
87	0.0145525
88	0.0417301
89	0.0577085
90	0.0469905
92	0.0538302
94	0.0604697
95	0.0237842
98	0.0621895
99	0.11572
104	0.0691661
105	0.229753
106	0.0591241
107	0.0775937
108	0.0666929
109	0.0396319
110	0.0295881
111	0.0166405
112	0.0178873
113	0.0261352
114	0.0383992
116	0.0163946
117	0.0031514
121	0.0214143
122	0.0332998
123	0.0200338
124	0.0413409
125	0.00683403
126	0.0167302
127	0.0633232
128	0.0498851
130	0.00454383
131	0.0309176
132	0.013673
133	0.00803
134	0.0673002
135	0.159827
138	0.033136
139	0.0331752
140	0.043028
141	0.0255949
142	0.0152251
143	0.0122307
148	0.00494919
149	0.0233366
152	0.0410906
154	0.0294549
156	0.0320864
157	0.0119494
158	0.109682
159	0.0257981
160	0.0853068
164	0.0716372
165	0.0690658
166	0.00954892
167	0.0726846
168	0.0274988
170	0.0248822
171	0.0293979
173	0.0368443
177	0.0259625
178	0.0306359
179	0.00801156
180	0.0389328
181	0.0810713
183	0.134819
184	0.0804294
185	0.040792
186	0.0281302
188	0.00735933
189	0.0268158
190	0.0384381
195	0.0268713
196	0.0414834
197	0.0310482
198	0.0177637
199	0.0242646
200	0.0127393
201	0.011893
203	0.018796
204	0.0198381
205	0.00868817
206	0.0149008
207	0.0106488

## Sheet: Figure 1f
Figure 1f
Residue Number	CSP
85	0.0177
86	0.01516
87	0.01101
88	0.03652
89	0.0382
90	0.03288
92	0.03977
94	0.06681
95	0.0307
97	0.03187
98	0.05575
99	0.13669
101	0.18812
102	0.18306
104	0.10096
105	0.15069
106	0.1321
107	0.07082
108	0.03834
109	0.00958
110	0.02021
111	0.02215
112	0.00886
113	0.02514
114	0.08833
115	0.04458
116	0.02761
117	0.00308
120	0.01388
121	0.02451
122	0.02948
123	0.00627
124	0.03347
125	0.00998
126	0.01077
127	0.01319
128	0.07285
129	0.00197
130	0.00537
131	0.03925
132	0.02937
133	0.00332
134	0.04893
135	0.05957
138	0.03167
139	0.01901
140	0.30441
141	0.04776
142	0.00913
143	0.02327
148	0.01089
149	0.08037
152	0.01662
153	0.02087
154	0.03554
155	0.01847
156	0.13499
157	0.02733
158	0.10887
159	0.03538
160	0.07288
164	0.13852
165	0.07298
166	0.07832
167	0.08314
168	0.04128
170	0.00494
171	0.02518
173	0.03777
177	0.01648
178	0.01101
179	0.01316
180	0.01347
181	0.01785
183	0.08422
184	0.08765
185	0.03189
186	0.01474
188	0.02924
189	0.00931
190	0.03196
195	0.04186
196	0.02692
197	0.02223
198	0.01607
199	0.01835
200	0.03983
201	0.07138
203	0.00889
204	0.01404
205	0.00514
206	0.01324
207	0.01115

## Sheet: Figure 2b
Figure 2b
Residue Number	CSP
466	0.041
467	0.103
469	0.177
470	0.041
471	0.058
472	0.304
473	0.079
474	0.23
475	0.026
476	0.192
477	0.251
478	0.234
479	0.188
480	0.267
481	0.166
482	0.141
483	0.193
485	0.697
486	0.188
487	0.173
488	0.337
489	0.188
490	0.19
491	0.117
492	0.062
493	0.098
494	0.09
495	0.107
496	0.179
497	0.213

## Sheet: Figure 2c
Figure 2c
Residue Number	CSP
97	0.00532527
99	0.016767
100	0.00608277
101	0.0320261
102	0.0558789
103	0.0337151
105	0.00979309
107	0.00562451
108	0.0143871
109	0.0100631
110	0.0109433
111	0.0207389
112	0.0236102
114	0.0465846
117	0.13877
118	0.13028
119	0.00475548
120	0.030118
122	0.0305887
123	0.0818994
124	0.00409643
125	0.00248426
127	0.00750522
129	0.00970469
130	0.00989004
131	0.0621634
132	0.0100968
133	0.0219034
134	0.0127585
135	0.00660888
136	0.00744614
137	0.0391947
138	0.032877
139	0.0173925
140	0.0073822
141	0.00839513
143	0.0326024
144	0.00354414
145	0.00435325
146	0.00441036
147	0.0109327
148	0.00489
149	0.00764052
150	0.00163192
154	0.0148906
155	0.00558042
156	0.00734919
157	0.0233006
159	0.0258128
160	0.00373588
161	0.0344949
162	0.00898158
163	0.00354414
164	0.00327181
165	0.04683
168	0.0126929
169	0.00163192
170	0.00399913
171	0.00595451
172	0.0445032
173	0.0594022
174	0.00841825
175	0.00750522
176	0.0463725
179	0.0178352
180	0.00871623
181	0.00800361
182	0.0148581
184	0.0198242
185	0.00928935
186	0.0130777
187	0.0266894
188	0.00098
189	0.0183645
192	0.00692067
193	0.0229752
195	0.0320088
196	0.0204414
197	0.0286138
198	0.00219853
199	0.00603783
200	0.00999863
201	0.00998552
202	0.00693593
203	0.0148906
204	0.071075
205	0.00692067
206	0.0361718
207	0.00467526
208	0.00301513
209	0.00455729
210	0.00789473
211	0.0203328
212	0.0152003
213	0.0116546
214	0.00104022
215	0.0207608
216	0.0102432
217	0.0153088
218	0.0118248
220	0.0101309
224	0.00867007
225	0.00821465
226	0.012977
227	0.00591892
228	0.00989004
229	0.0163815
230	0.0108708
231	0.00190527
232	0.00310109
233	0.00440592
234	0.00400286
235	0.00337866
236	0.0119533
237	0.000990267
238	0.0305338
239	0.0241791
240	0.0217162
241	0.00340599
242	0.0269602
243	0.00998888
245	0.00693593
247	0.0170632
248	0.0106687
249	0.0357864
251	0.0117744
252	0.0394847
253	0.00957673
254	0.00995016
255	0.013953
256	0.00646883
257	0.0092577
258	0.0069746
259	0.00303
260	0.00497508
261	0.00693593
262	0.0078919
263	0.00562715
264	0.00406582
265	0.0133474
266	0.00522
267	0.0102908
268	0.00494346
269	0.0306166
270	0.0259502
271	0.00854603
272	0.00925407
273	0.0197363
274	0.00118138
275	0.0227775
276	0.0116514
277	0.0484655
279	0.0497798
280	0.0820761
281	0.0266749
282	0.0226606
283	0.0167771
284	0.00865941
285	0.0177724
286	0.00585566
287	0.00496733
289	0.00748921
290	0.00152514
291	0.0417268
292	0.077277
293	0.00996213

## Sheet: Figure 4b
Figure 4b
Residue Number	CSP
1	0.00890213
2	0.0121064
3	0.00409663
5	0.0271179
6	0.02117
7	0.0463385
9	0.0179804
10	0.0487543
11	0.0329272
14	0.0565507
15	0.0316559
17	0.0256149
18	0.0215216
19	0.0584062
20	0.118696
21	0.0667627
22	0.0367439
23	0.110469
24	0.170231
25	0.131189
26	0.176844
28	0.0415244
29	0.0691468
30	0.164592
31	0.0721428
32	0.157816
33	0.110232
35	0.109029
37	0.0562791
38	0.135207
39	0.0183405
40	0.182417
41	0.111773
42	0.152196
43	0.169526
44	0.23959
45	0.25876
46	0.06243
48	0.322666
49	0.275049
50	0.150313
51	0.458356
52	0.358917
53	0.521458
54	0.229358
55	0.354524
56	0.0920389
57	0.169278
59	0.0182969
61	0.0204186
62	0.0288399
63	0.0374915
65	0.0371079
66	0.0120521
68	0.0159396
69	0.0058322
73	0.0785423
74	0.00999036
81	0.012603
90	0.0017969
91	0.00430223
93	0.00247174
94	0.00897721

## Sheet: Figure 4c
Figure 4c
Residue Number	CSP
39	0.100641
40	0.103788
41	0.0402803
42	0.0301149
43	0.128159
44	0.208594
45	0.222631
46	0.0709297
48	0.262585
49	0.253212
50	0.165894
51	0.486184
52	0.24858
53	0.343276
54	0.510797
55	0.397424
56	0.102042
57	0.0837994

## Sheet: Figure 4d
Figure 4d
Residue Number	CSP
1	0.0129993
2	0.0159256
3	0.0306903
4	0.0414907
5	0.0757493
6	0.0243791
8	0.0410206
9	0.0407843
10	0.016759
11	0.045677
12	0.0960388
13	0.0696773
14	0.0538742
15	0.0517602
16	0.147572
17	0.0700124
18	0.0841051
19	0.0370314
20	0.0825137
21	0.0794276
22	0.0714586
23	0.0343671
24	0.0274848
25	0.0605035
26	0.0202369
27	0.0437563
28	0.0689114
29	0.0807304
30	0.0179536
31	0.0240794
37	0.151134
38	0.224897
39	0.118148
40	0.176887
41	0.112366
42	0.055763

## Sheet: Figure 5a
Figure 5a
Residue Number	ΔΔ(Cα-Cβ) free	ΔΔ(Cα-Cβ) bound
2	-0.36272	-0.17937
3	-0.34144	-0.36213
4		-0.35593
5	-0.64619	-0.67389
6		0.06462
7	-0.12007	-0.04376
8		0.11672
9	-0.01664	0.04777
10	0.08763	0.12609
11	0.04651	0.13521
12	0.36961	0.6357
13		1.01886
14	1.01903	1.15766
15	0.72432	0.68657
16	0.73236	0.97899
17	0.30773	0.64095
18	0.41237	0.55559
19		0.41133
20		0.55844
21	-0.45944	-0.34994
22	-0.61317	-0.5826
24		0.56883
25		0.79166
26		0.47263
33		6.83459
34		1.49838
36		-0.09423
37		-0.20878
45	-0.58725	-0.64926

[truncated: 42 more sheets: Figure 5b, Figure 6c, Supplementary Figure 3a, Supplementary Figure 3b, Supplementary Figure 3c, Supplementary Figure 3d, Supplementary Figure 4a, Supplementary Figure 4b, Supplementary Figure 4c_panel1, Supplementary Figure 4c_panel2, Supplementary Figure 4c_panel3, Supplementary Figure 4c_panel4, Supplementary Figure 4c_panel5, Supplementary Figure 6a_panel1, Supplementary Figure 6a_panel2, Supplementary Figure 6a_panel3, Supplementary Figure 6b_panel1, Supplementary Figure 6b_panel2, Supplementary Figure 6b_panel3, Supplementary Figure 6c_panel1 …]
